# Supplementary material for: Single pot synthesis of indirect band gap 2D CsPb2Br5nanosheets from direct band gap 3D CsPbBr3nanocrystals and the origin of their luminescence properties
Source: Royal Society of Chemistry journal article supplement (doi:10.1039/c8nr09349k), 2019-01-01
Supplement: c8nr09349k1.pdf [file c8nr09349k1.pdf]

## Electronic Supporting Information (ESI)

### **Single pot synthesis of indirect band gap 2D CsPb<sub>2</sub>Br<sub>5</sub> nanosheets from direct band gap 3D CsPbBr<sub>3</sub> nanocrystals and the origin of their luminescence properties**

Paribesh Acharyya, <sup>1</sup>Provas Pal, <sup>1</sup>Pralok K. Samanta, <sup>2</sup>Arka Sarkar, <sup>1</sup>Swapan K. Pati, <sup>1, 2, 3</sup> and Kanishka Biswas\*, <sup>1, 3</sup>

<sup>1</sup>New Chemistry Unit and <sup>2</sup>Theoretical Sciences Unit, Jawaharlal Nehru Centre for Advanced Scientific Research (JNCASR), Bangalore 560064, India.

<sup>3</sup>School of Advanced Materials and International Centre of Materials Science, Jawaharlal Nehru Centre for Advanced Scientific Research (JNCASR), Jakkur P.O., Bangalore 560064, India.

\*E-mail: [kanishka@jncasr.ac.in](mailto:kanishka@jncasr.ac.in)

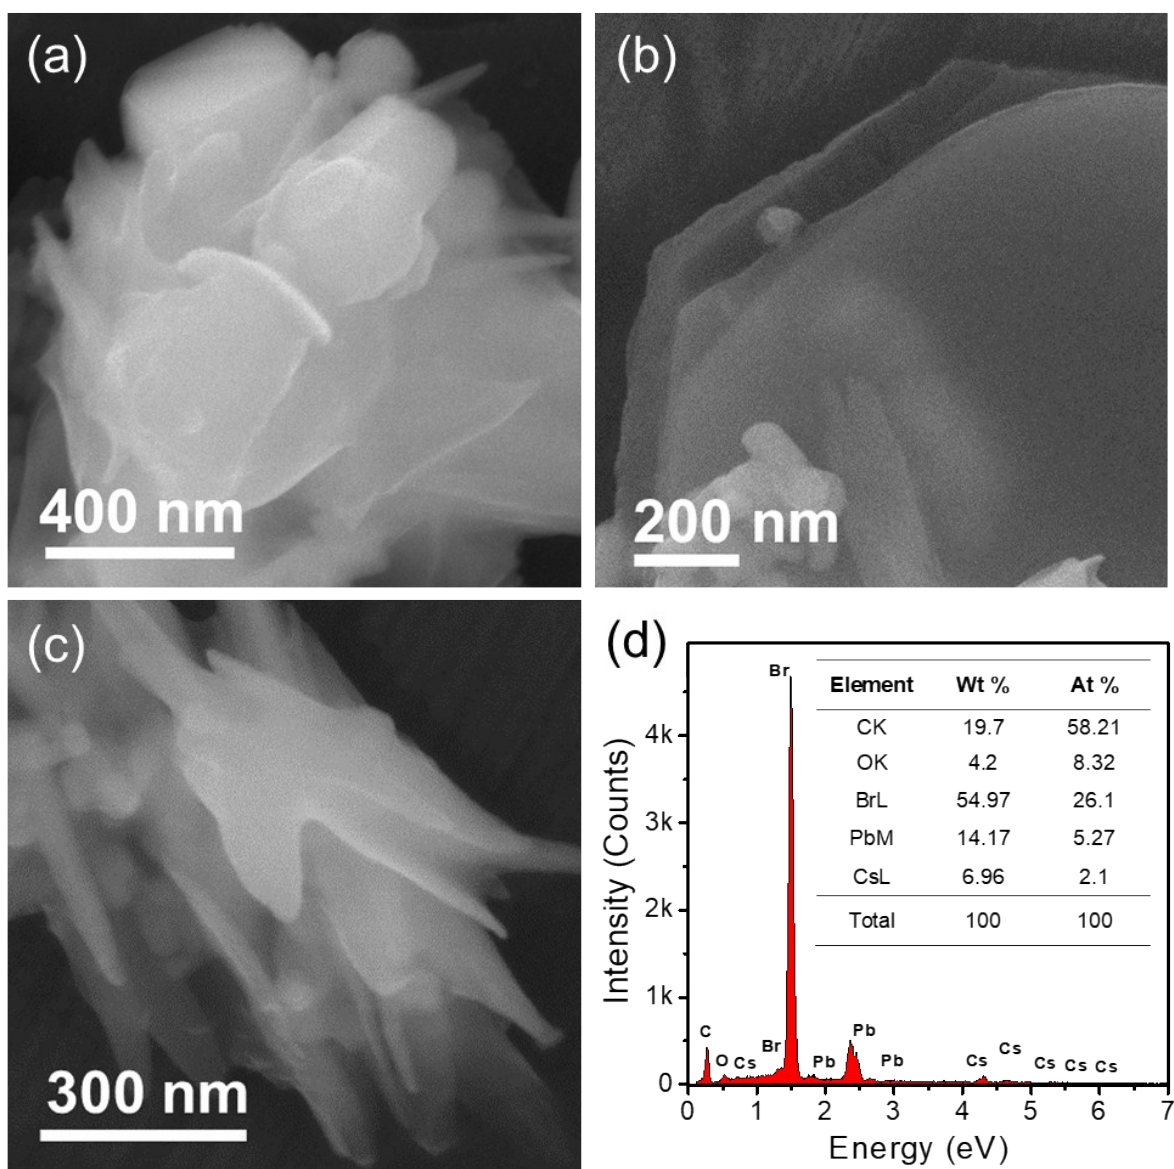

**Fig. S1.** FESEM images of the CsPb<sub>2</sub>Br<sub>5</sub> nanosheets (a-c) and (d) EDAX spectra of CsPb<sub>2</sub>Br<sub>5</sub>

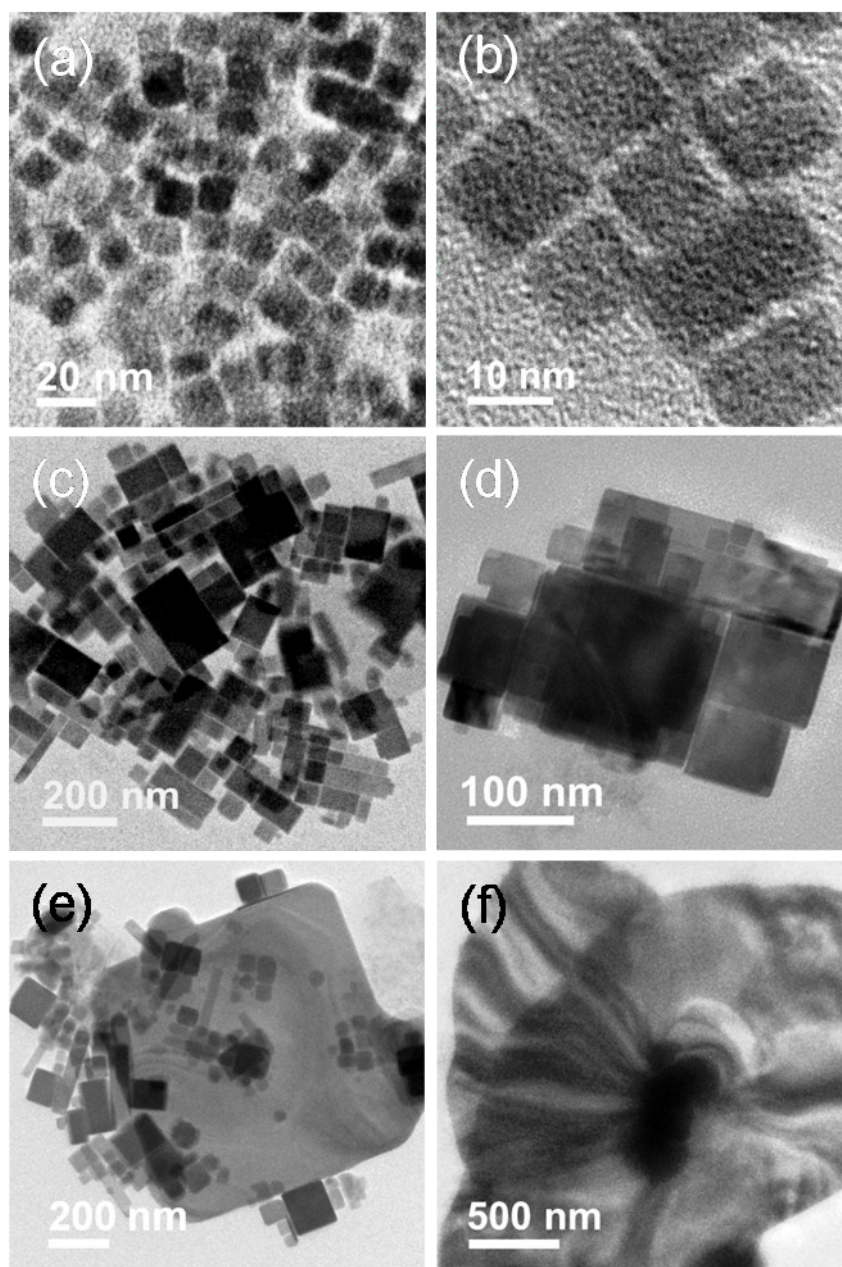

**Fig. S2.** (a) and (b) TEM images of the nanocrystals after immediate quenching of reaction mixture, (c) and (d) TEM image of the nanocrystals obtained after 3 and 5 min of reactions respectively, contain mixture of  $\text{CsPbBr}_3$  and  $\text{CsPb}_2\text{Br}_5$ , (e) TEM image of  $\text{CsPb}_2\text{Br}_5$  nanoplate along with small nanocrystals obtained in 10 mins of reaction, (f) TEM image of the  $\text{CsPb}_2\text{Br}_5$  nanosheets in 20 mins.

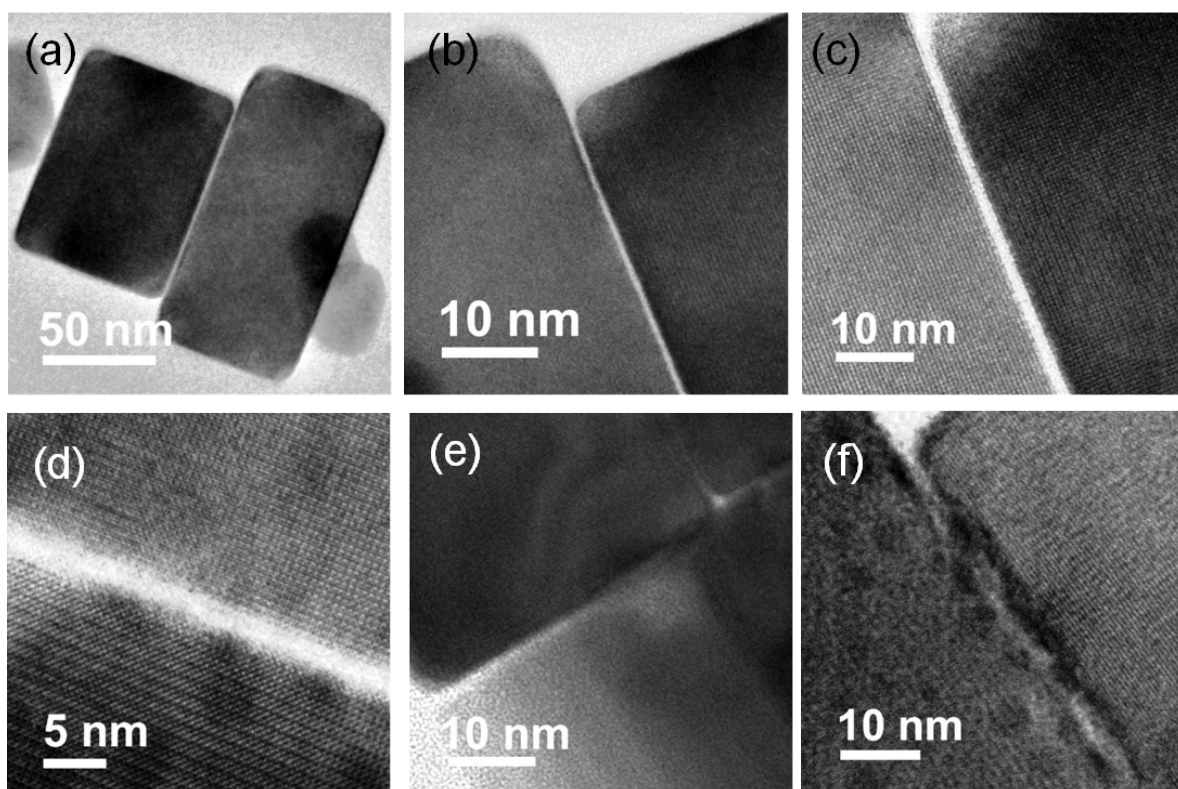

**Fig. S3.** (a) and (b) TEM images of the nanocrystals (NCs) in 3 mins, (c) and (d) TEM/HRTEM images of the nanocrystals in 3 mins contains NCs close to each other, (e) TEM image of square shaped  $\text{CsPbBr}_3$  NCs along with  $\text{CsPb}_2\text{Br}_5$ , after 5 mins, (f) HRTEM image clearly shows that the lateral attachment of NCs to form the larger nanoplate type structure.

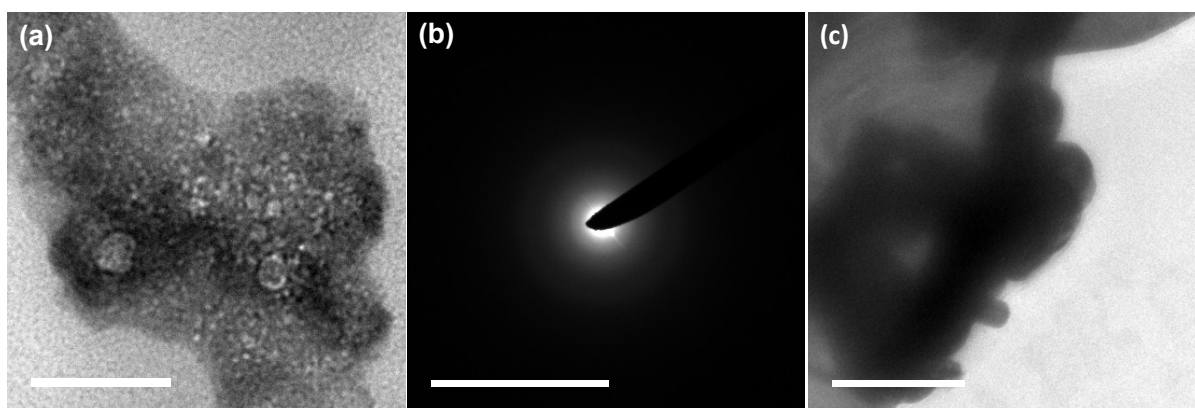

**Fig. S4.** (a)TEM image and (b) Selected Area Electron Diffraction pattern of controlled reaction, (c) TEM image of amorphous coating in  $\text{CsPb}_2\text{Br}_5$ .

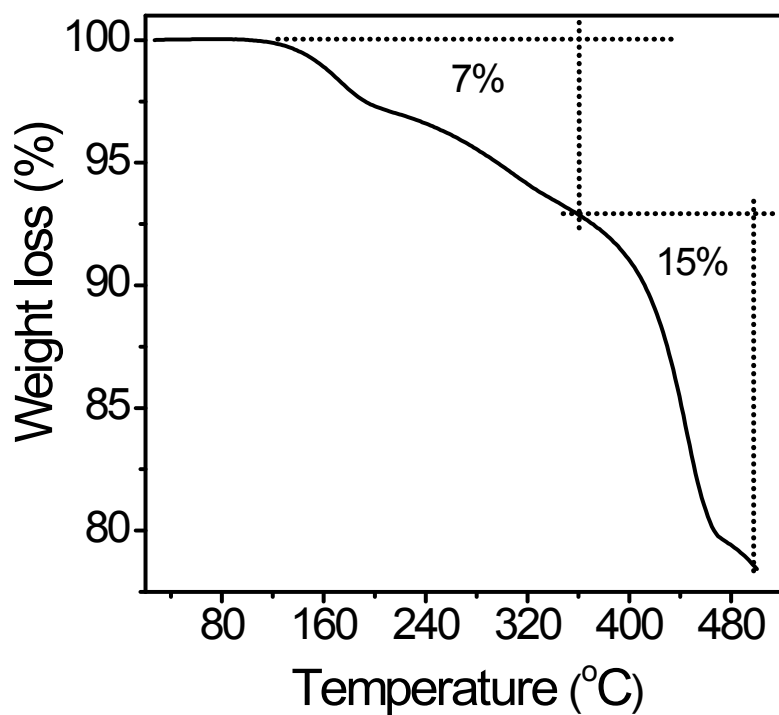

**Fig. S5.** TGA curve of as-synthesized  $\text{CsPb}_2\text{Br}_5$ .

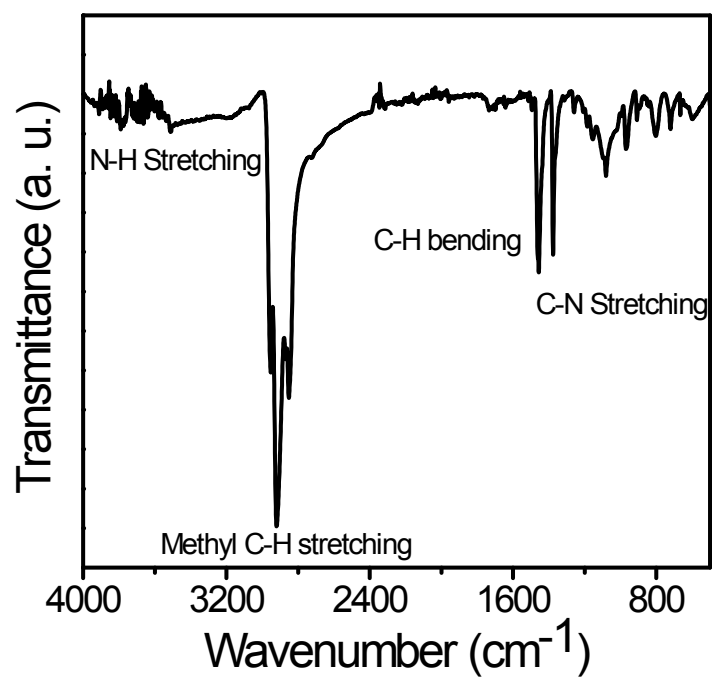

**Fig. S6.** FTIR spectra of as-synthesized  $\text{CsPb}_2\text{Br}_5$ .
